# Supplementary material for: In situ formed metal nanoparticle systems for catalytic reduction of nitroaromatic compounds
Source: Royal Society of Chemistry journal article supplement (doi:10.1039/c4ra07494g), 2014-09-24
Supplement: c4ra07494g1.pdf [file c4ra07494g1.pdf]

## *In situ* forming metal nanoparticles systems for catalytic reduction of nitroaromatic compounds

Xiao-Qiong Wu,<sup>a</sup> Xing-Wen Wu,<sup>a</sup> Jiang-Shan Shen<sup>\*a,b</sup> and Hong-Wu Zhang<sup>\*a</sup>

<sup>a</sup>Institute of Urban Environment, Chinese Academy of Sciences, Xiamen, 361021, China. Fax: (+86)592-619-0773; Tel: (+86)592-619-0773; E-mail: jsshens@iue.ac.cn; hwzhang@iue.ac.cn.

<sup>b</sup>Ningbo Urban Environment Observation and Research Station, Chinese Academy of Sciences, Ningbo, 315800, China.

**Electronic Supplementary Information (ESI)**

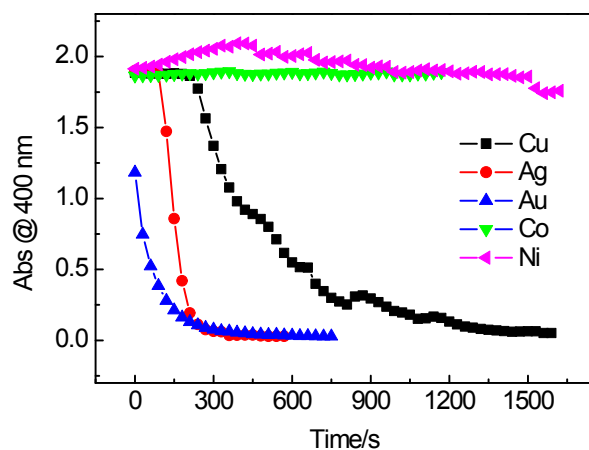

**Fig. S1** Comparison of time-dependent UV-*vis* absorption spectra of 4-NP in the presence of NaBH<sub>4</sub> and metal ions (Cu<sup>2+</sup>, Ag<sup>+</sup>, AuCl<sub>4</sub><sup>-</sup>, Co<sup>2+</sup> and Ni<sup>2+</sup>). [4-NP] = 0.1 mM; [NaBH<sub>4</sub>] = 25 mM; [Metal ions] = 2 μM; T = 22.4°C.

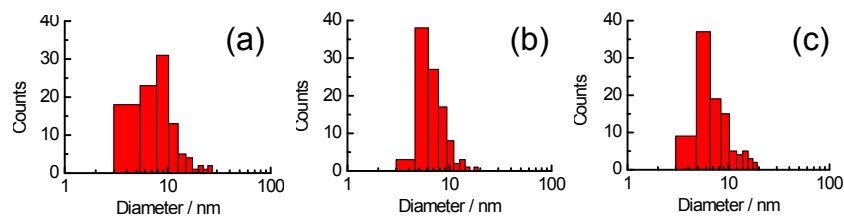

**Fig. S2** The size distribution of *in situ* formed Cu (a), Ag (b) and Au (c) nanoparticles obtained from TEM experiments.

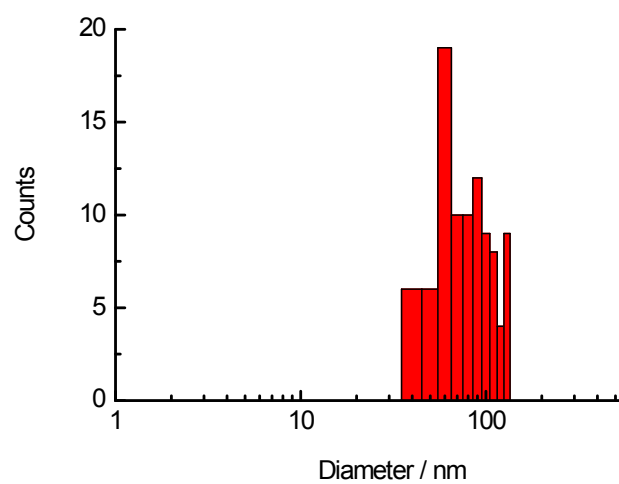

**Fig. S3** The size distribution of *in situ* formed Ni nanoparticles obtained from TEM experiments.

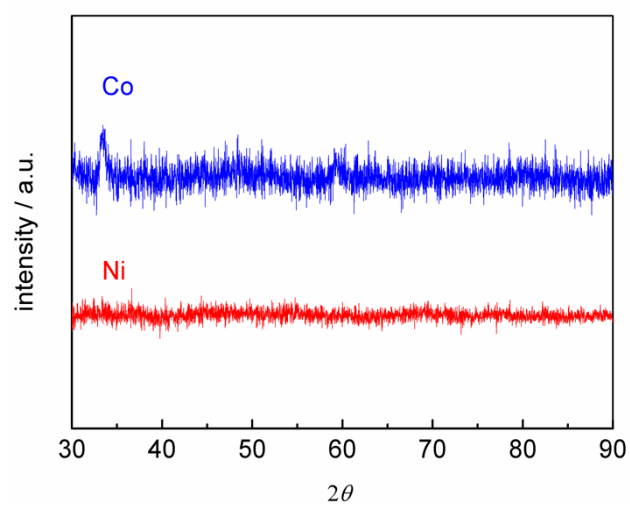

**Fig. S4** XRD patterns of the *in situ* formed Co and Ni nanoparticles.

**Table S1:** The reaction time for fitting  $\ln(C_t/C_0)$  versus  $t$  to obtain  $K$ .

| Time for Fig. 4/s |                                                                      | Time for Fig. 5/s |                                                            | Time for Fig. 6/s |                                                                     | Time for Fig. 10/s |                                                    |
|-------------------|----------------------------------------------------------------------|-------------------|------------------------------------------------------------|-------------------|---------------------------------------------------------------------|--------------------|----------------------------------------------------|
| Cu                | 80~320(10 mM)<br>20~200(30 mM)<br>30~190(50 mM)<br>160~450(60 mM)    | Cu                | 30~180(70 $\mu$ M)<br>20~200(0.1 mM)<br>20~140(0.13 mM)    | Cu                | 70~250(1 $\mu$ M)<br>20~200(2 $\mu$ M)<br>0~40(4 $\mu$ M)           | Cu                 | 20~200(24 °C)<br>0~80(30 °C)<br>0~40(35 °C)        |
| Ag                | 200~400(10 mM)<br>190~300(20 mM)<br>190~320(30 mM)<br>130~250(40 mM) | Ag                | 250~350(70 $\mu$ M)<br>190~300(0.1 mM)<br>140~210(0.13 mM) | Ag                | 400~510(0.5 $\mu$ M)<br>190~300(1 $\mu$ M)<br>0~30(2 $\mu$ M)       | Ag                 | 80~180(19 °C)<br>190~300(24 °C)<br>80~120(29 °C)   |
| Au                | 50~400(5 mM)<br>30~300(10 mM)<br>50~200(20 mM)<br>60~200(30 mM)      | Au                | 50~200(70 $\mu$ M)<br>50~200(0.1 mM)<br>10~180(0.13 mM)    | Au                | 40~300(0.3 $\mu$ M)<br>50~200(0.67 $\mu$ M)<br>10~100(1 $\mu$ M)    | Au                 | 50~200(24 °C)<br>10~200(30 °C)<br>10~100(35 °C)    |
| Co                | 50~170(10 mM)<br>30~150(20 mM)<br>30~150(30 mM)<br>30~150(40 mM)     | Co                | 30~150(70 $\mu$ M)<br>30~150(0.1 mM)<br>40~170(0.13 mM)    | Co                | 40~160(50 $\mu$ M)<br>30~150(100 $\mu$ M)<br>20~110(150 $\mu$ M)    | Co                 | 30~150(24 °C)<br>30~150(30 °C)<br>0~80(35 °C)      |
| Ni                | 720~920(20 mM)<br>550~800(30 mM)<br>370~550(40 mM)<br>330~490(60 mM) | Ni                | 230~550(70 $\mu$ M)<br>550~800(0.1 mM)<br>250~450(0.13 mM) | Ni                | 1070~1180(30 $\mu$ M)<br>550~800(47 $\mu$ M)<br>390~550(80 $\mu$ M) | Ni                 | 550~800(24 °C)<br>280~360(30 °C)<br>160~210(35 °C) |

**Table S2:** The diameters of *in situ* formed metal nanoparticles obtained from Scherrer equation.

|    | $\beta/^\circ$ | $\theta/^\circ$ | D/nm |
|----|----------------|-----------------|------|
| Cu | 0.235          | 19.104          | 27.8 |
| Ag | 0.304          | 21.695          | 8.8  |
| Au | 0.6            | 19.18           | 13.8 |

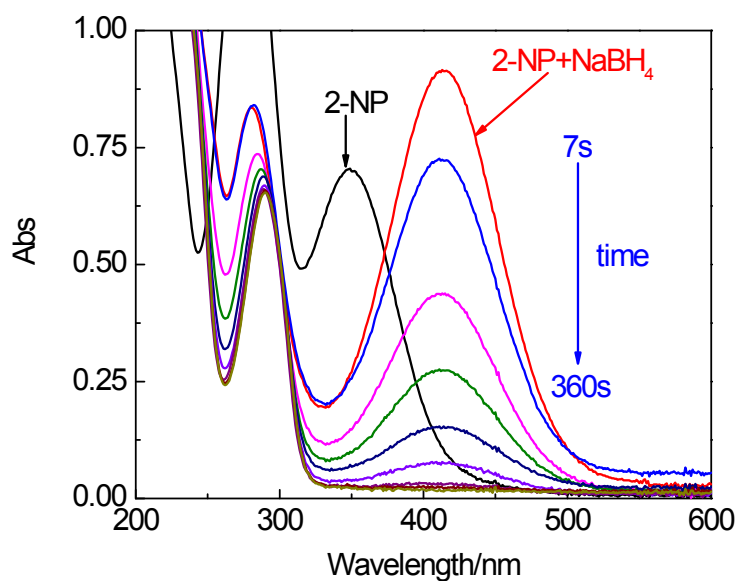

**Fig. S5** Time-dependent UV-*vis* absorption spectra of 2-NP in the presence of NaBH<sub>4</sub> and Cu<sup>2+</sup>. [2-NP] =  $2 \times 10^{-4}$  M; [NaBH<sub>4</sub>] =  $2 \times 10^{-2}$  M; [Cu<sup>2+</sup>] =  $2.7 \times 10^{-6}$  M; T = 24 °C. The time interval is 60 seconds between two sequential lines.

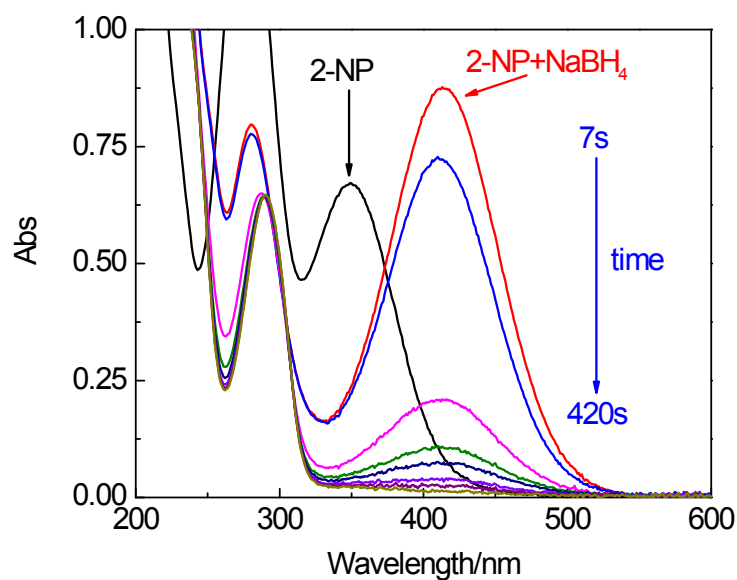

**Fig. S6** Time-dependent UV-*vis* absorption spectra of 2-NP in the presence of NaBH<sub>4</sub> and Ag<sup>+</sup>. [2-NP] =  $2 \times 10^{-4}$  M; [NaBH<sub>4</sub>] =  $2 \times 10^{-2}$  M; [Ag<sup>+</sup>] =  $1.2 \times 10^{-6}$  M; T = 24 °C. The time interval is 60 seconds between two sequential lines.

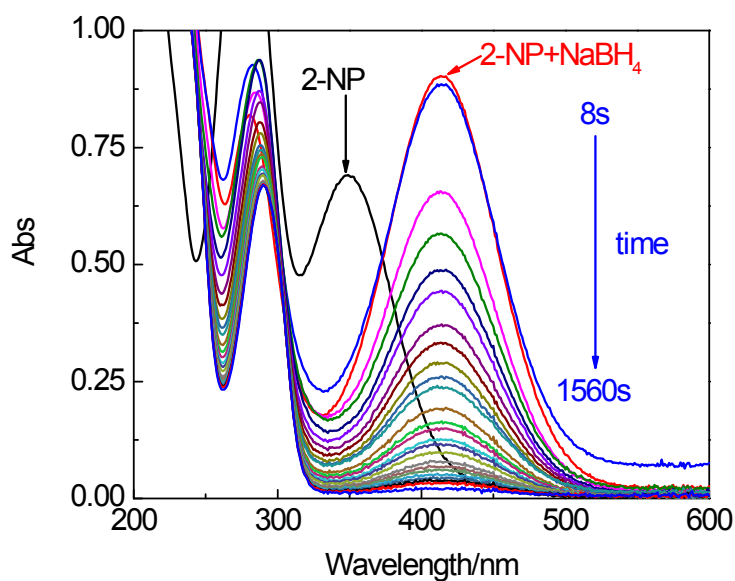

**Fig. S7** Time-dependent UV-*vis* absorption spectra of 2-NP in the presence of NaBH<sub>4</sub> and AuCl<sub>4</sub><sup>-</sup>. [2-NP] =  $2 \times 10^{-4}$  M; [NaBH<sub>4</sub>] =  $2 \times 10^{-2}$  M; [AuCl<sub>4</sub><sup>-</sup>] =  $6.7 \times 10^{-7}$  M; T = 24 °C. The time interval is 60 seconds between two sequential lines.

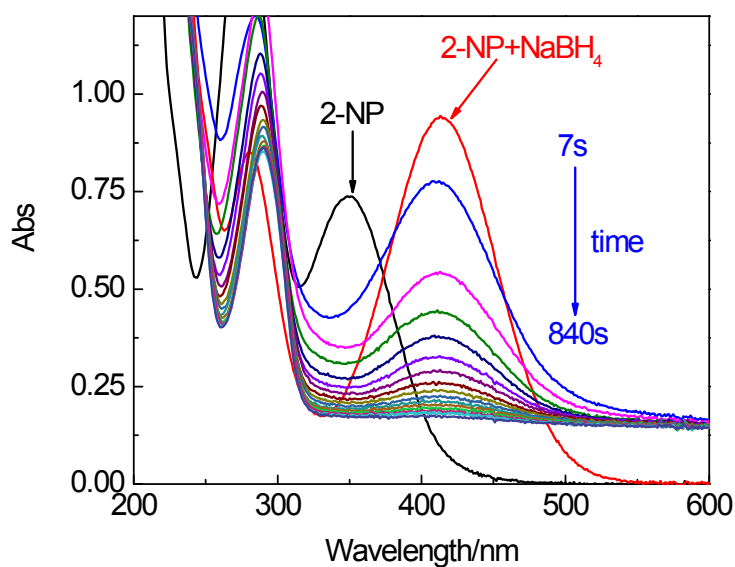

**Fig. S8** Time-dependent UV-*vis* absorption spectra of 2-NP in the presence of NaBH<sub>4</sub> and Co<sup>2+</sup>. [2-NP] =  $2 \times 10^{-4}$  M; [NaBH<sub>4</sub>] =  $2 \times 10^{-2}$  M; [Co<sup>2+</sup>] =  $1 \times 10^{-4}$  M; T = 24 °C. The time interval is 60 seconds between two sequential lines.

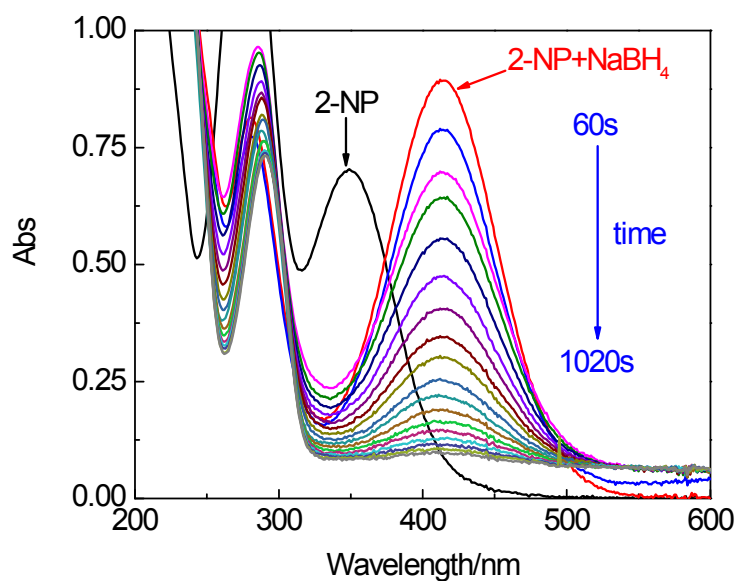

**Fig. S9** Time-dependent UV-vis absorption spectra of 2-NP in the presence of NaBH<sub>4</sub> and Ni<sup>2+</sup>. [2-NP] =  $2 \times 10^{-4}$  M; [NaBH<sub>4</sub>] =  $2 \times 10^{-2}$  M; [Ni<sup>2+</sup>] =  $4.7 \times 10^{-5}$  M; T = 24 °C. The time interval is 60 seconds between two sequential lines. The time interval is 60 seconds between two sequential lines.

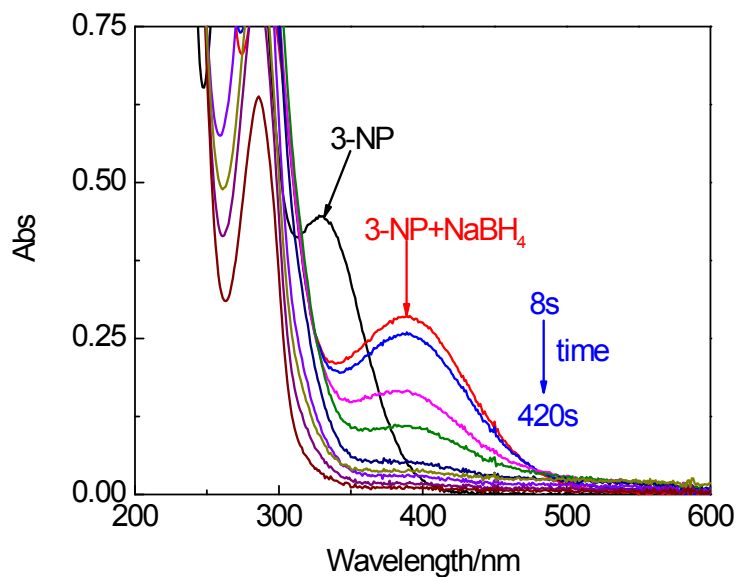

**Fig. S10** Time-dependent UV-vis absorption spectra of 3-NP in the presence of NaBH<sub>4</sub> and Cu<sup>2+</sup>. [3-NP] =  $2 \times 10^{-4}$  M; [NaBH<sub>4</sub>] =  $2 \times 10^{-2}$  M; [Cu<sup>2+</sup>] =  $2 \times 10^{-6}$  M; T = 24 °C. The time interval is 60 seconds between two sequential lines. The time interval

is 60 seconds between two sequential lines.

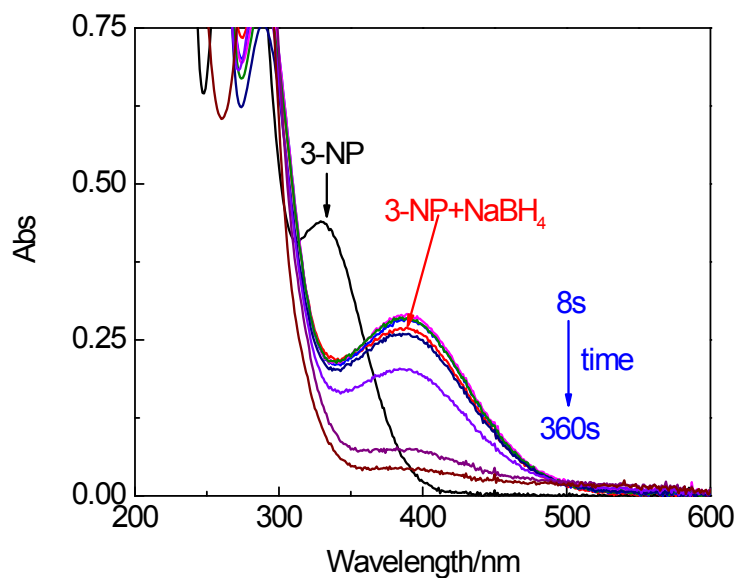

**Fig. S11** Time-dependent UV-*vis* absorption spectra of 3-NP in the presence of NaBH<sub>4</sub> and Ag<sup>+</sup>. [3-NP] =  $2 \times 10^{-4}$  M; [NaBH<sub>4</sub>] =  $2 \times 10^{-2}$  M; [Ag<sup>+</sup>] =  $1 \times 10^{-6}$  M; T = 24 °C. The time interval is 60 seconds between two sequential lines.

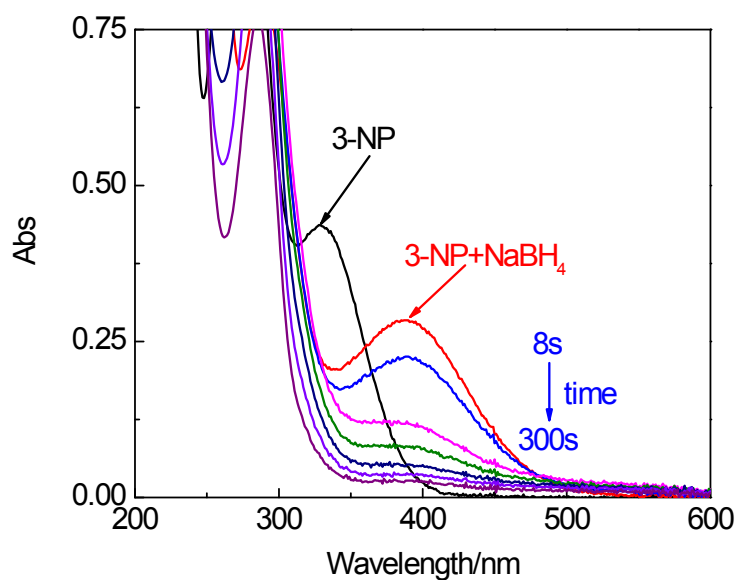

**Fig. S12** Time-dependent UV-*vis* absorption spectra of 3-NP in the presence of NaBH<sub>4</sub> and AuCl<sub>4</sub><sup>-</sup>. [3-NP] =  $2 \times 10^{-4}$  M; [NaBH<sub>4</sub>] =  $2 \times 10^{-2}$  M; [AuCl<sub>4</sub><sup>-</sup>] =  $6.7 \times 10^{-7}$  M; T = 24 °C. The time interval is 60 seconds between two sequential lines.



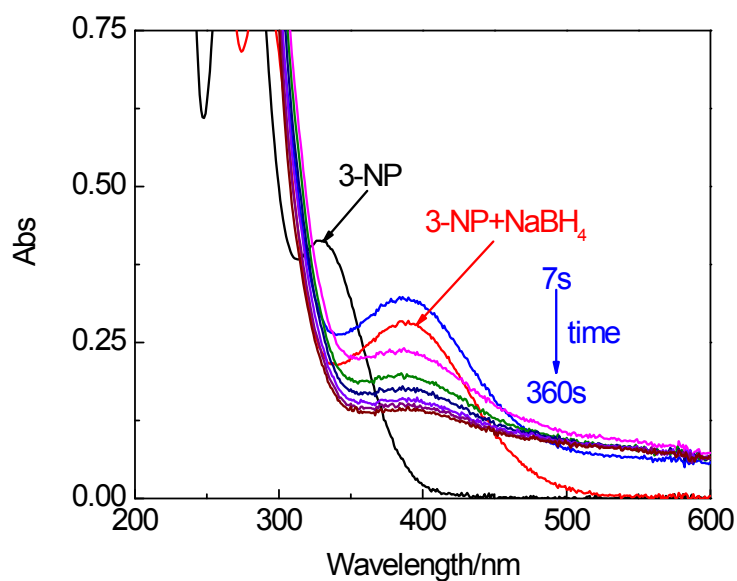

**Fig. S13** Time-dependent UV-*vis* absorption spectra of 3-NP in the presence of NaBH<sub>4</sub> and Co<sup>2+</sup>. [3-NP] =  $2 \times 10^{-4}$  M; [NaBH<sub>4</sub>] =  $2 \times 10^{-2}$  M; [Co<sup>2+</sup>] =  $3.3 \times 10^{-5}$  M; T = 24 °C. The time interval is 60 seconds between two sequential lines.

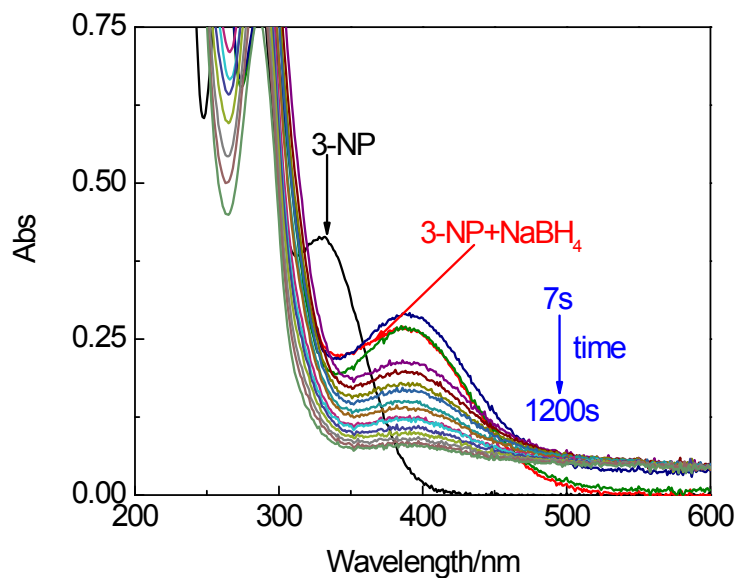

**Fig. S14** Time-dependent UV-*vis* absorption spectra of 3-NP in the presence of NaBH<sub>4</sub> and Ni<sup>2+</sup>. [3-NP] =  $2 \times 10^{-4}$  M; [NaBH<sub>4</sub>] =  $2 \times 10^{-2}$  M; [Ni<sup>2+</sup>] =  $4 \times 10^{-5}$  M; T = 24 °C. The time interval is 60 seconds between two sequential lines.

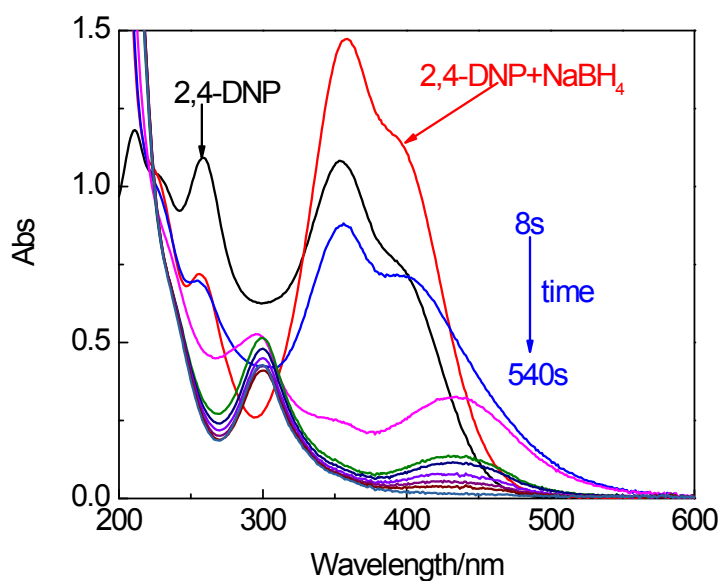

**Fig. S15** Time-dependent UV-*vis* absorption spectra of 2,4-DNP in the presence of NaBH<sub>4</sub> and Cu<sup>2+</sup>. [2,4-DNP] =  $1 \times 10^{-4}$  M; [NaBH<sub>4</sub>] =  $2 \times 10^{-2}$  M; [Cu<sup>2+</sup>] =  $2 \times 10^{-6}$  M; T = 24 °C. The time interval is 60 seconds between two sequential lines.

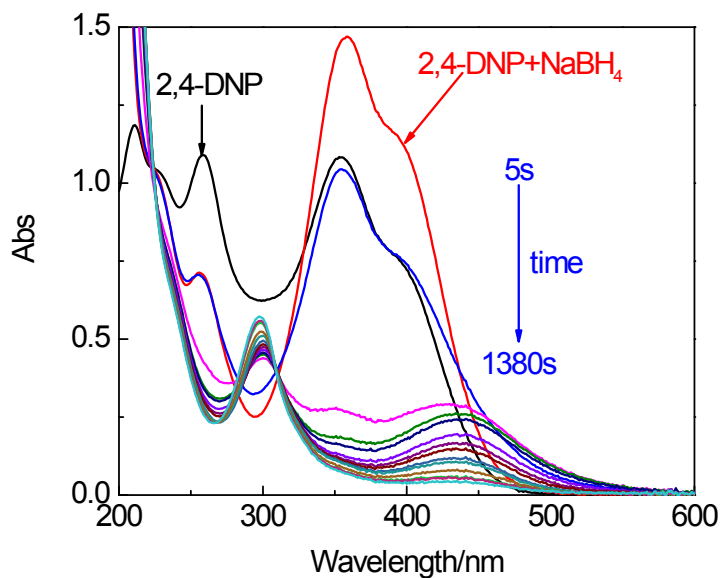

**Fig. S16** Time-dependent UV-*vis* absorption spectra of 2,4-DNP in the presence of NaBH<sub>4</sub> and Ag<sup>+</sup>. [2,4-DNP] =  $1 \times 10^{-4}$  M; [NaBH<sub>4</sub>] =  $2 \times 10^{-2}$  M; [Ag<sup>+</sup>] =  $1 \times 10^{-6}$  M; T = 24 °C. The time interval is 60 seconds between two sequential lines.

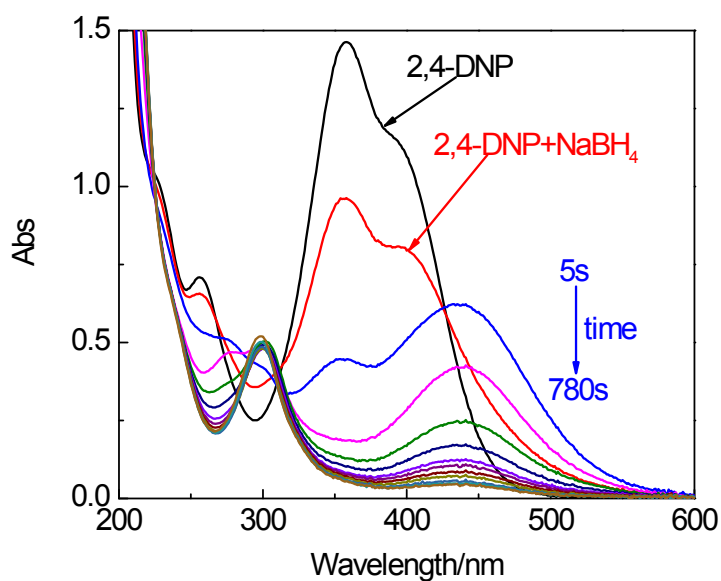

**Fig. S17** Time-dependent UV-*vis* absorption spectra of 2,4-DNP in the presence of  $\text{NaBH}_4$  and  $\text{AuCl}_4^-$ .  $[\text{2,4-DNP}] = 1 \times 10^{-4} \text{ M}$ ;  $[\text{NaBH}_4] = 2 \times 10^{-2} \text{ M}$ ;  $[\text{AuCl}_4^-] = 6.7 \times 10^{-7} \text{ M}$ ;  $T = 24^\circ \text{C}$ . The time interval is 60 seconds between two sequential lines.

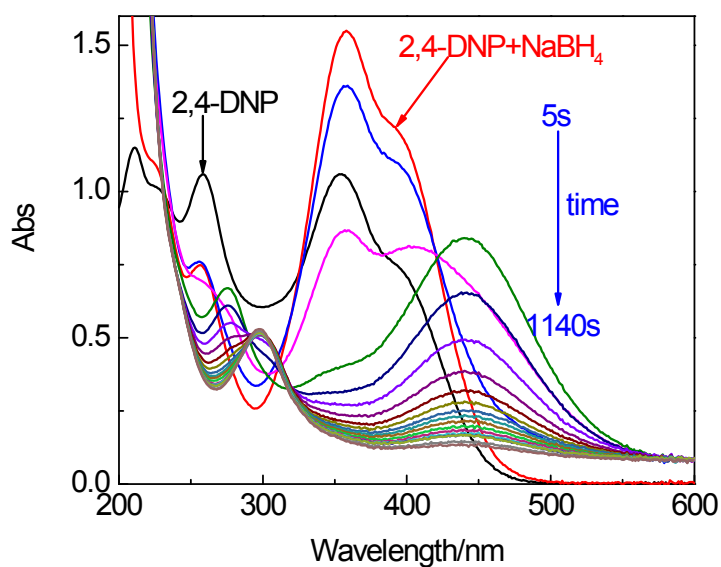

**Fig. S18** Time-dependent UV-*vis* absorption spectra of 2,4-DNP in the presence of  $\text{NaBH}_4$  and  $\text{Co}^{2+}$ .  $[\text{2,4-DNP}] = 1 \times 10^{-4} \text{ M}$ ;  $[\text{NaBH}_4] = 2 \times 10^{-2} \text{ M}$ ;  $[\text{Co}^{2+}] = 1 \times 10^{-4} \text{ M}$ ;  $T = 24^\circ \text{C}$ . The time interval is 60 seconds between two sequential lines.

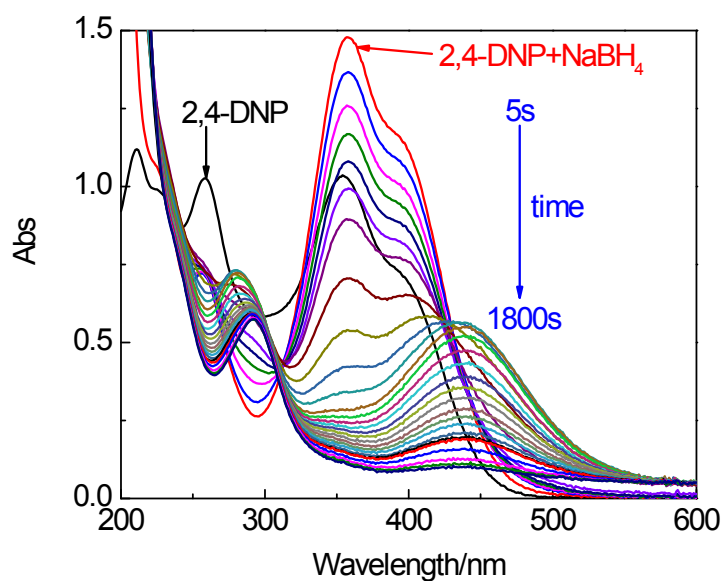

**Fig. S19** Time-dependent UV-*vis* absorption spectra of 2,4-DNP in the presence of NaBH<sub>4</sub> and Ni<sup>2+</sup>. [2,4-DNP] =  $1 \times 10^{-4}$  M; [NaBH<sub>4</sub>] =  $2 \times 10^{-2}$  M; [Ni<sup>2+</sup>] =  $4.7 \times 10^{-5}$  M; T = 24 °C. The time interval is 60 seconds between two sequential lines.

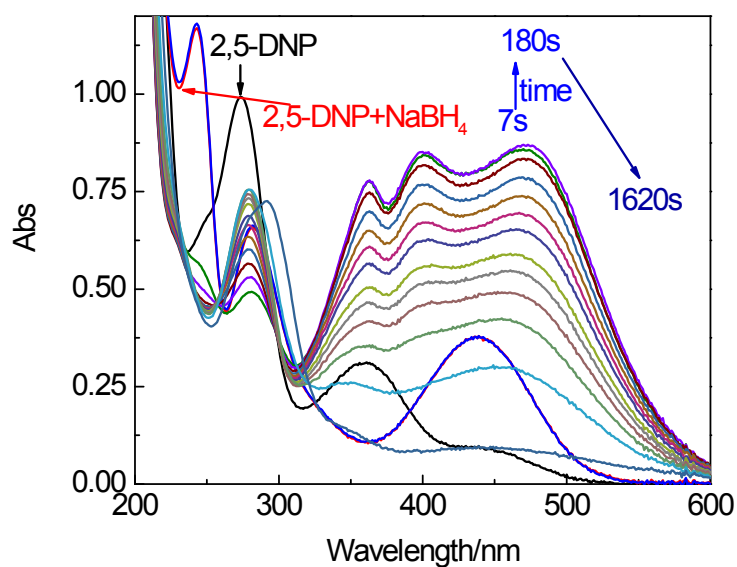

**Fig. S20** Time-dependent UV-*vis* absorption spectra of 2,5-DNP in the presence of NaBH<sub>4</sub> and Cu<sup>2+</sup>. [2,5-DNP] =  $1 \times 10^{-4}$  M; [NaBH<sub>4</sub>] =  $2 \times 10^{-2}$  M; [Cu<sup>2+</sup>] =  $2 \times 10^{-6}$  M; T = 24 °C. The time interval is 60 seconds between two sequential lines.

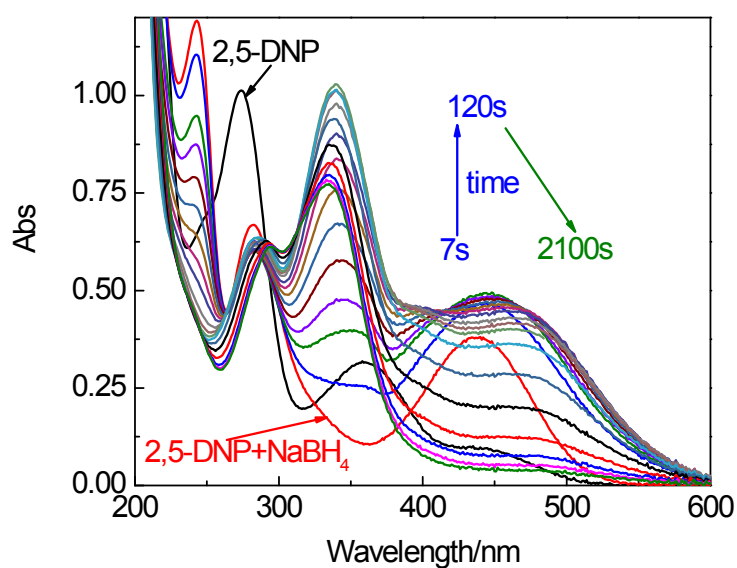

**Fig. S21** Time-dependent UV-*vis* absorption spectra of 2,5-DNP in the presence of NaBH<sub>4</sub> and Ag<sup>+</sup>. [2,5-DNP] =  $1 \times 10^{-4}$  M; [NaBH<sub>4</sub>] =  $2 \times 10^{-2}$  M; [Ag<sup>+</sup>] =  $1.3 \times 10^{-6}$  M; T = 24 °C. The time interval is 60 seconds between two sequential lines.

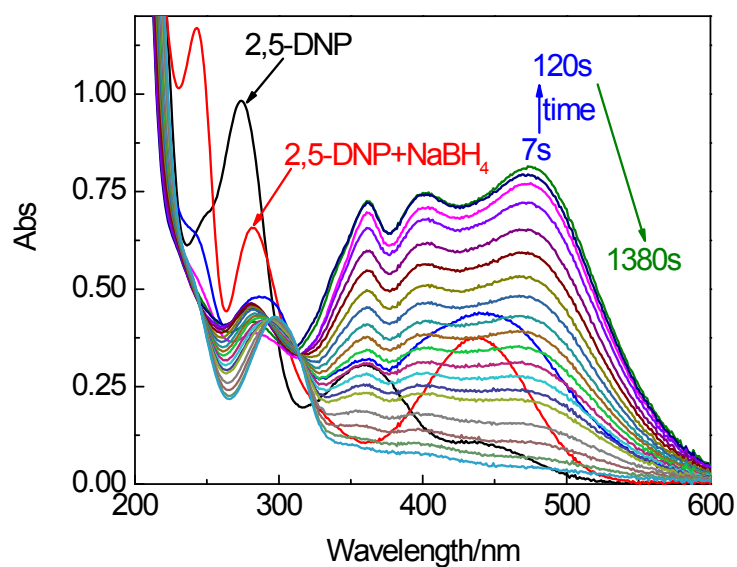

**Fig. S22** Time-dependent UV-*vis* absorption spectra of 2,5-DNP in the presence of NaBH<sub>4</sub> and AuCl<sub>4</sub><sup>-</sup>. [2,5-DNP] =  $1 \times 10^{-4}$  M; [NaBH<sub>4</sub>] =  $2 \times 10^{-2}$  M; [AuCl<sub>4</sub><sup>-</sup>] =  $6.7 \times 10^{-7}$  M; T = 24 °C. The time interval is 60 seconds between two sequential lines.

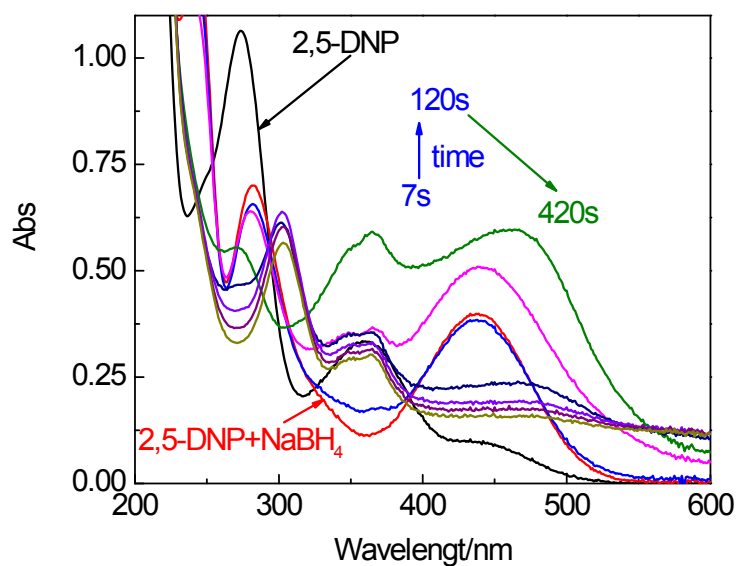

**Fig. S23** Time-dependent UV-*vis* absorption spectra of 2,5-DNP in the presence of NaBH<sub>4</sub> and Co<sup>2+</sup>. [2,5-DNP] =  $1 \times 10^{-4}$  M; [NaBH<sub>4</sub>] =  $4 \times 10^{-2}$  M; [Co<sup>2+</sup>] =  $1 \times 10^{-4}$  M; T = 24 °C. The time interval is 60 seconds between two sequential lines.

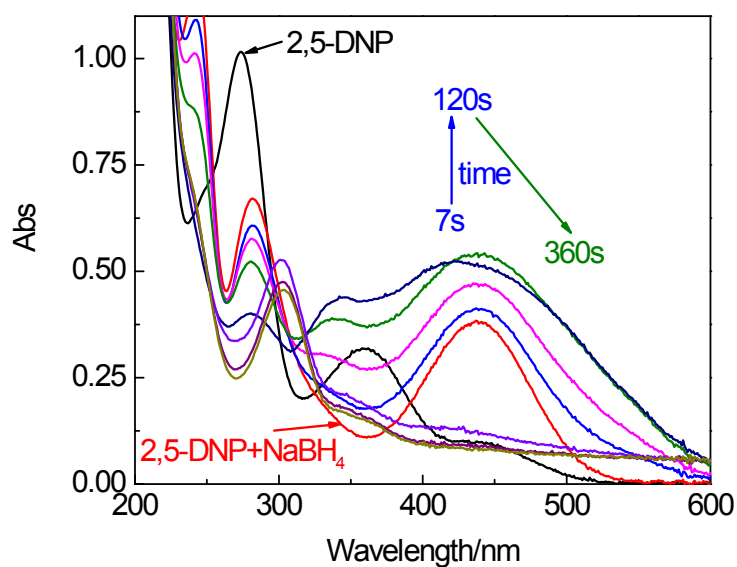

**Fig. S24** Time-dependent UV-*vis* absorption spectra of 2,5-DNP in the presence of NaBH<sub>4</sub> and Ni<sup>2+</sup>. [2,5-DNP] =  $1 \times 10^{-4}$  M; [NaBH<sub>4</sub>] =  $4 \times 10^{-2}$  M; [Ni<sup>2+</sup>] =  $4.7 \times 10^{-5}$  M; T = 24 °C. The time interval is 60 seconds between two sequential lines.

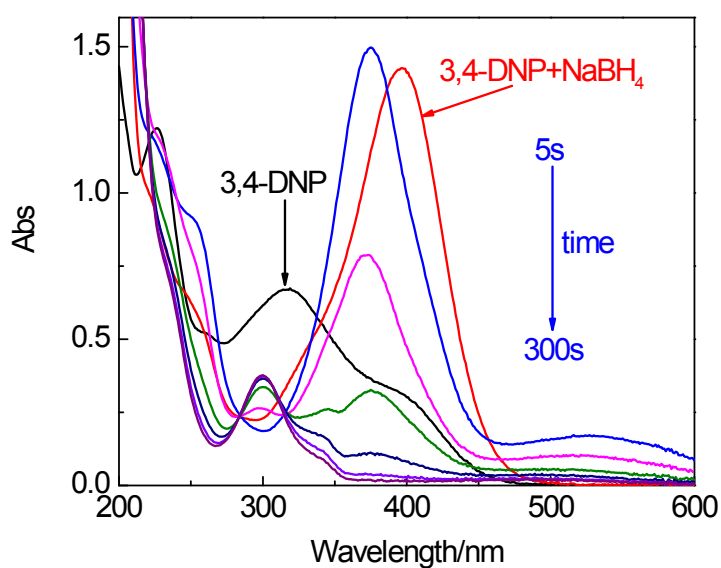

**Fig. S25** Time-dependent UV-*vis* absorption spectra of 3,4-DNP in the presence of NaBH<sub>4</sub> and Cu<sup>2+</sup>. [3,4-DNP] =  $1 \times 10^{-4}$  M; [NaBH<sub>4</sub>] =  $2 \times 10^{-2}$  M; [Cu<sup>2+</sup>] =  $2 \times 10^{-6}$  M; 24 °C. The time interval is 60 seconds between two sequential lines.

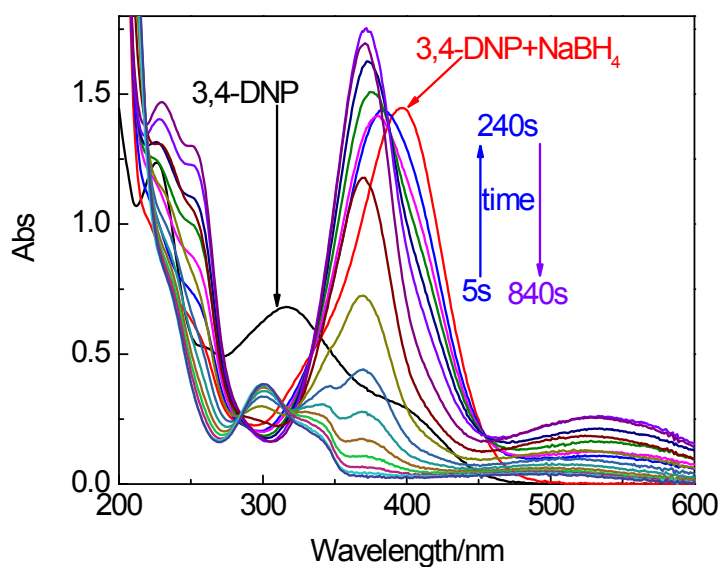

**Fig. S26** Time-dependent UV-*vis* absorption spectra of 3,4-DNP in the presence of NaBH<sub>4</sub> and Ag<sup>+</sup>. [3,4-DNP] =  $1 \times 10^{-4}$  M; [NaBH<sub>4</sub>] =  $2 \times 10^{-2}$  M; [Ag<sup>+</sup>] =  $1 \times 10^{-6}$  M; T = 24 °C. The time interval is 60 seconds between two sequential lines.

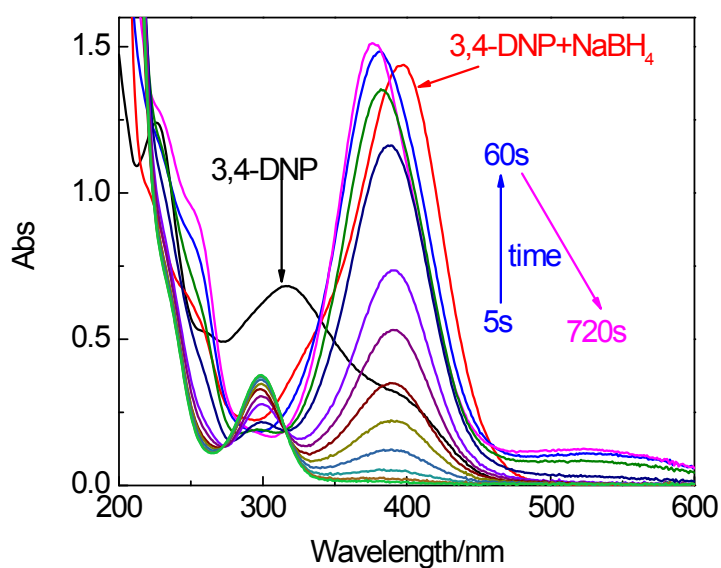

**Fig. S27** Time-dependent UV-*vis* absorption spectra of 3,4-DNP in the presence of NaBH<sub>4</sub> and AuCl<sub>4</sub><sup>-</sup>. [3,4-DNP] =  $1 \times 10^{-4}$  M; [NaBH<sub>4</sub>] =  $2 \times 10^{-2}$  M; [AuCl<sub>4</sub><sup>-</sup>] =  $6.7 \times 10^{-7}$  M; T = 24 °C. The time interval is 60 seconds between two sequential lines.

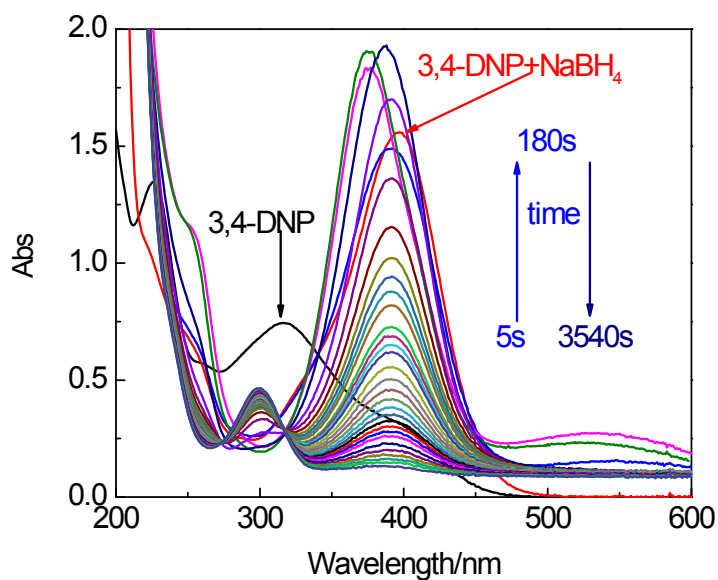

**Fig. S28** Time-dependent UV-*vis* absorption spectra of 3,4-DNP in the presence of NaBH<sub>4</sub> and Co<sup>2+</sup>. [3,4-DNP] =  $1 \times 10^{-4}$  M; [NaBH<sub>4</sub>] =  $4 \times 10^{-2}$  M; [Co<sup>2+</sup>] =  $1.4 \times 10^{-4}$  M; T = 24 °C. The time interval is 60 seconds between two sequential lines.



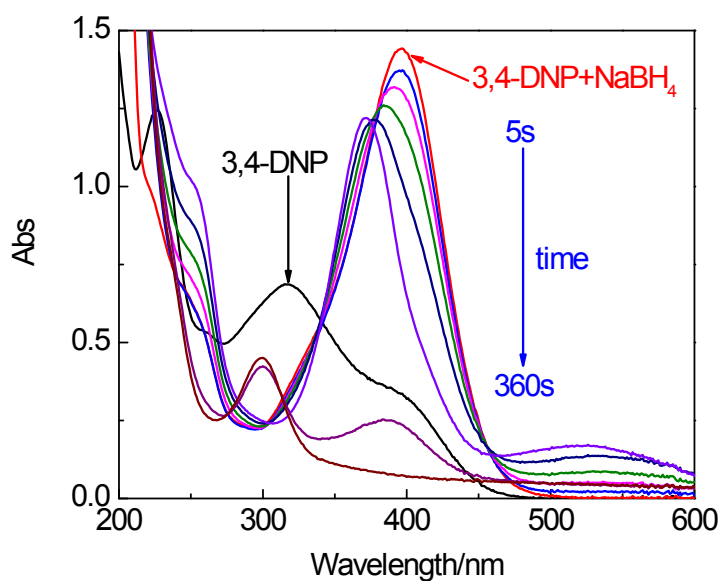

**Fig. S29** Time-dependent UV-*vis* absorption spectra of 3,4-DNP in the presence of NaBH<sub>4</sub> and Ni<sup>2+</sup>. [3,4-DNP] =  $1 \times 10^{-4}$  M; [NaBH<sub>4</sub>] =  $4 \times 10^{-2}$  M; [Ni<sup>2+</sup>] =  $4.7 \times 10^{-5}$  M; T = 24 °C. The time interval is 60 seconds between two sequential lines.

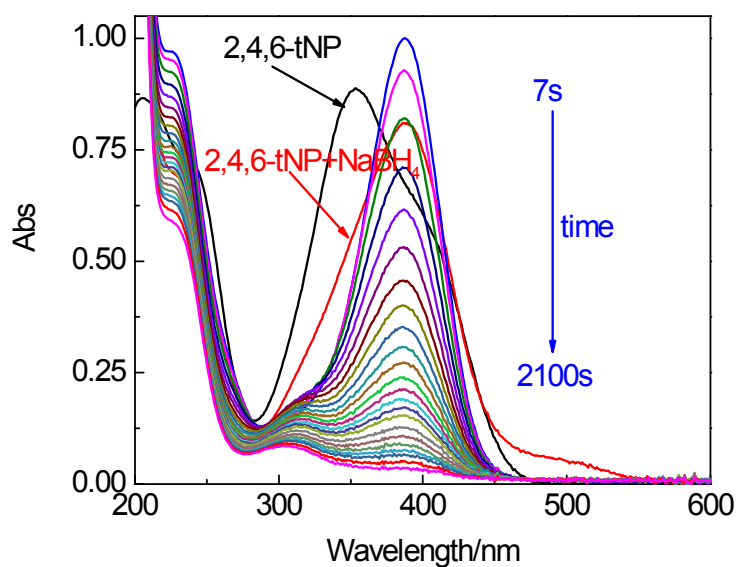

**Fig. S30** Time-dependent UV-*vis* absorption spectra of 2,4,6-tNP in the presence of NaBH<sub>4</sub> and Cu<sup>2+</sup>. [2,4,6-tNP] =  $5 \times 10^{-5}$  M; [NaBH<sub>4</sub>] =  $3 \times 10^{-2}$  M; [Cu<sup>2+</sup>] =  $6 \times 10^{-6}$  M; T = 24 °C. The time interval is 60 seconds between two sequential lines.

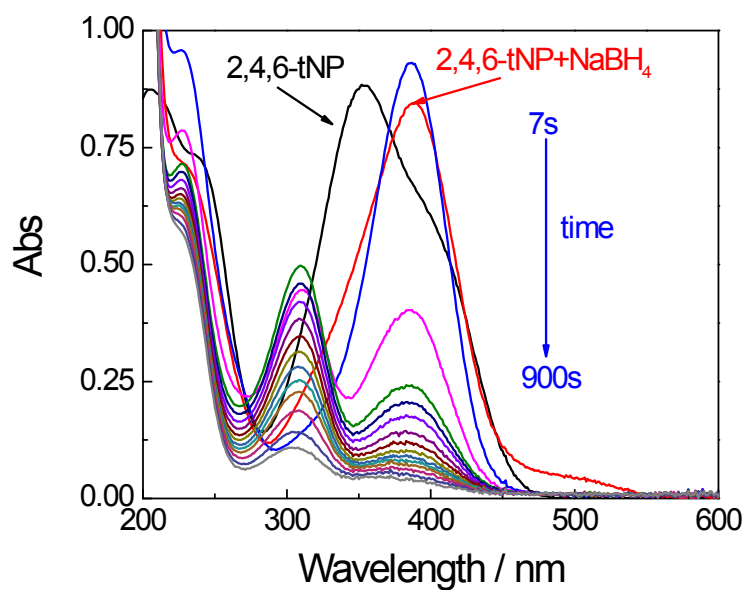

**Fig. S31** Time-dependent UV-*vis* absorption spectra of 2,4,6-tNP in the presence of NaBH<sub>4</sub> and Ag<sup>+</sup>. [2,4,6-tNP] =  $5 \times 10^{-5}$  M; [NaBH<sub>4</sub>] =  $3 \times 10^{-2}$  M; [Ag<sup>+</sup>] =  $3 \times 10^{-6}$  M; T = 24 °C. The time interval is 60 seconds between two sequential lines.

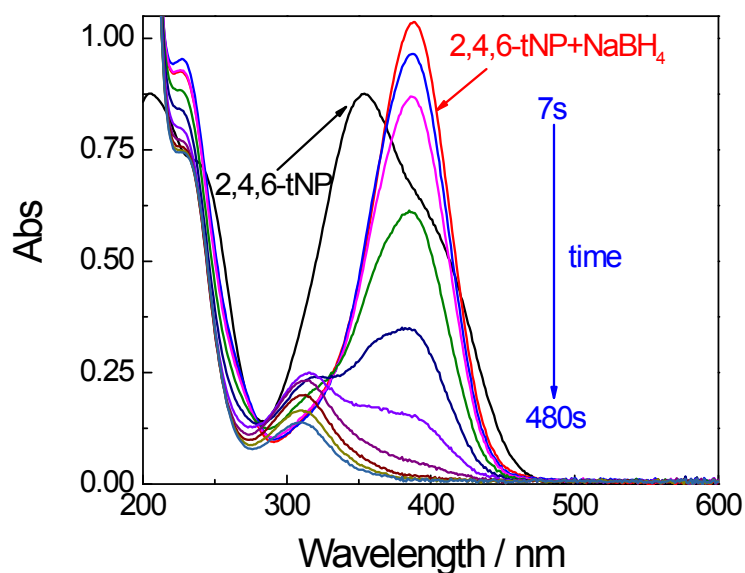

**Fig. S32** Time-dependent UV-*vis* absorption spectra of 2,4,6-tNP in the presence of NaBH<sub>4</sub> and AuCl<sub>4</sub><sup>-</sup>. [2,4,6-tNP] =  $5 \times 10^{-5}$  M; [NaBH<sub>4</sub>] =  $3 \times 10^{-2}$  M; [AuCl<sub>4</sub><sup>-</sup>] =  $1.7 \times 10^{-6}$  M; T = 24 °C. The time interval is 60 seconds between two sequential lines.

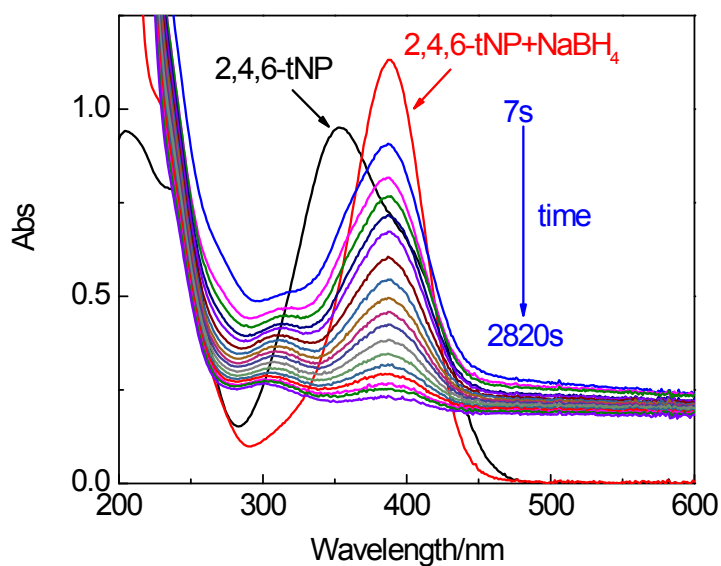

**Fig. S33** Time-dependent UV-*vis* absorption spectra of 2,4,6-tNP in the presence of NaBH<sub>4</sub> and Co<sup>2+</sup>. [2,4,6-tNP] =  $5 \times 10^{-5}$  M; [NaBH<sub>4</sub>] =  $6 \times 10^{-2}$  M; [Co<sup>2+</sup>] =  $1.5 \times 10^{-4}$  M; T = 24 °C. The time interval is 60 seconds between two sequential lines.

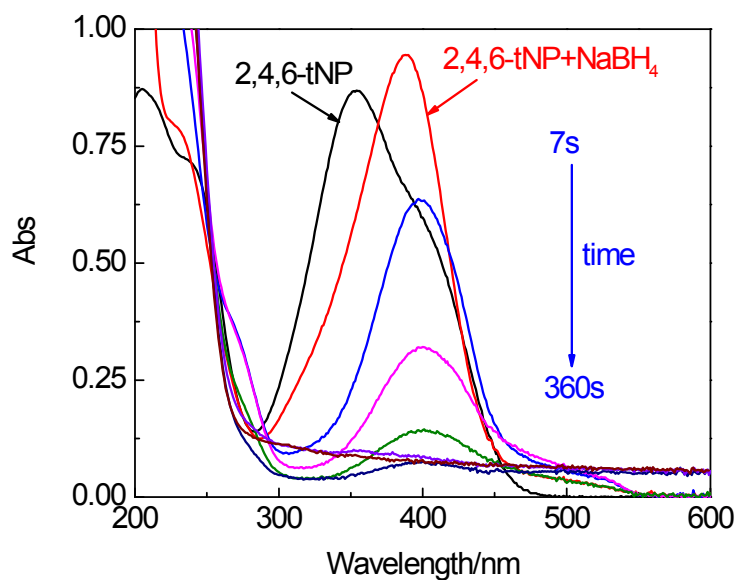

**Fig. S34** Time-dependent UV-*vis* absorption spectra of 2,4,6-tNP in the presence of NaBH<sub>4</sub> and Ni<sup>2+</sup>. [2,4,6-tNP] =  $5 \times 10^{-5}$  M; [NaBH<sub>4</sub>] =  $6 \times 10^{-2}$  M; [Ni<sup>2+</sup>] =  $4 \times 10^{-5}$  M; T = 24 °C. The time interval is 60 seconds between two sequential lines.

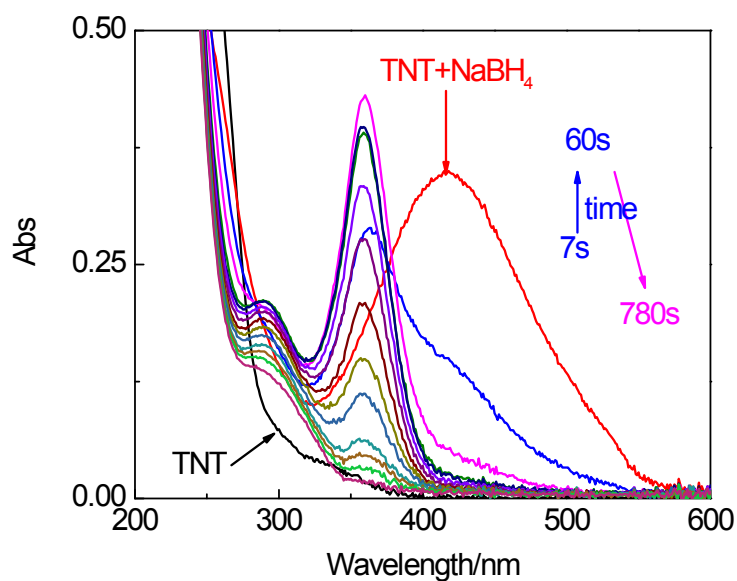

**Fig. S35** Time-dependent UV-*vis* absorption spectra of 2,4,6-tNT in the presence of NaBH<sub>4</sub> and Cu<sup>2+</sup>. [2,4,6-tNT] =  $5 \times 10^{-5}$  M; [NaBH<sub>4</sub>] =  $2 \times 10^{-2}$  M; [Cu<sup>2+</sup>] =  $2 \times 10^{-6}$  M; T = 24 °C. The time interval is 60 seconds between two sequential lines.

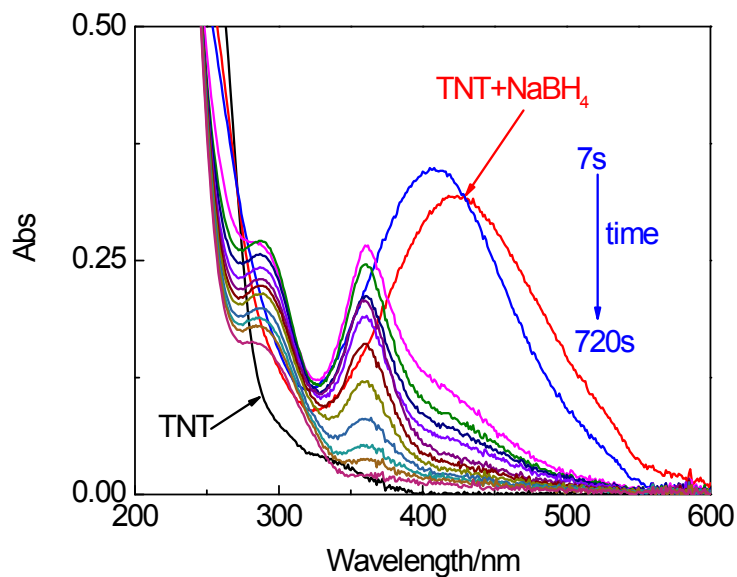

**Fig. S36** Time-dependent UV-*vis* absorption spectra of 2,4,6-tNT in the presence of NaBH<sub>4</sub> and Ag<sup>+</sup>. [2,4,6-tNT] =  $5 \times 10^{-5}$  M; [NaBH<sub>4</sub>] =  $2 \times 10^{-2}$  M; [Ag<sup>+</sup>] =  $1 \times 10^{-6}$  M; T = 24 °C. The time interval is 60 seconds between two sequential lines.

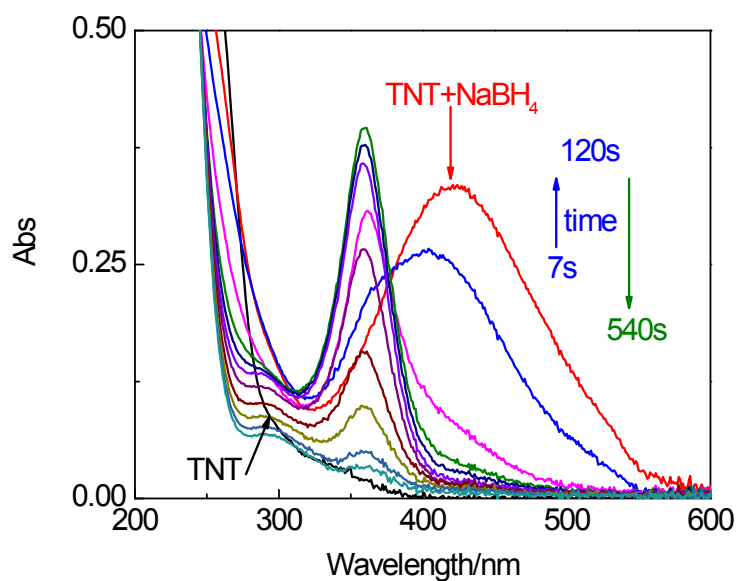

**Fig. S37** Time-dependent UV-*vis* absorption spectra of 2,4,6-tNT in the presence of  $\text{NaBH}_4$  and  $\text{AuCl}_4^-$ .  $[\text{2,4,6-tNT}] = 5 \times 10^{-5} \text{ M}$ ;  $[\text{NaBH}_4] = 2 \times 10^{-2} \text{ M}$ ;  $[\text{AuCl}_4^-] = 6.7 \times 10^{-7} \text{ M}$ ;  $T = 24 \text{ }^\circ\text{C}$ . The time interval is 60 seconds between two sequential lines.

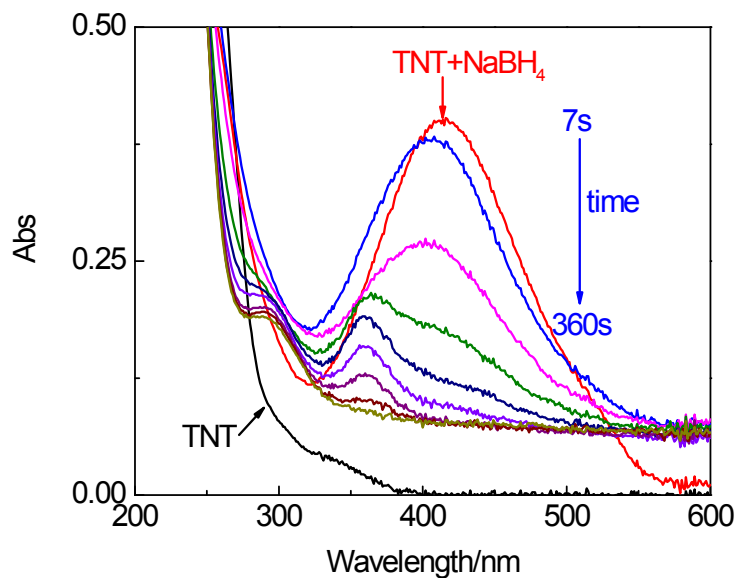

**Fig. S38** Time-dependent UV-*vis* absorption spectra of 2,4,6-tNT in the presence of  $\text{NaBH}_4$  and  $\text{Co}^{2+}$ .  $[\text{2,4,6-tNT}] = 5 \times 10^{-5} \text{ M}$ ;  $[\text{NaBH}_4] = 4 \times 10^{-2} \text{ M}$ ;  $[\text{Co}^{2+}] = 1 \times 10^{-4} \text{ M}$ ;  $T = 24 \text{ }^\circ\text{C}$ . The time interval is 60 seconds between two sequential lines.

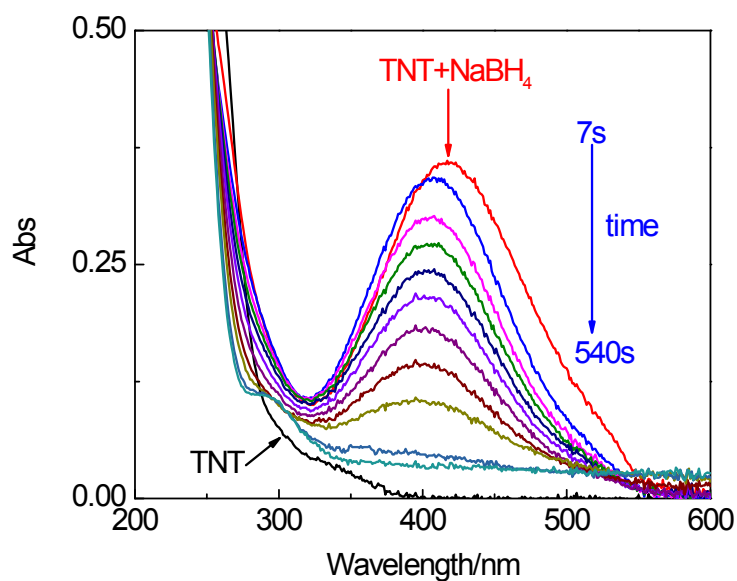

**Fig. S39** Time-dependent UV-*vis* absorption spectra of 2,4,6-tNT in the presence of NaBH<sub>4</sub> and Ni<sup>2+</sup>. [2,4,6-tNT] =  $5 \times 10^{-5}$  M; [NaBH<sub>4</sub>] =  $4 \times 10^{-2}$  M; [Ni<sup>2+</sup>] =  $3.3 \times 10^{-5}$  M; T = 24 °C. The time interval is 60 seconds between two sequential lines.

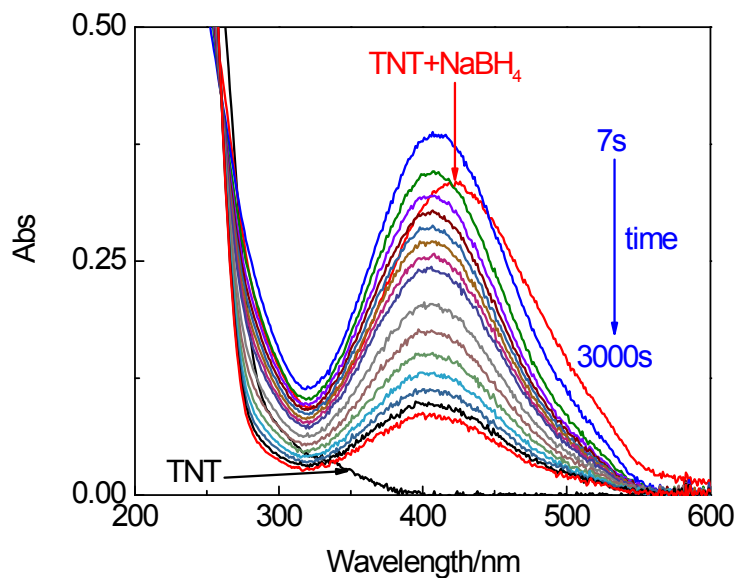

**Fig. S40** Time-dependent UV-*vis* absorption spectra of 2,4,6-tNT in the presence of NaBH<sub>4</sub> only. [2,4,6-tNT] =  $5 \times 10^{-5}$  M; [NaBH<sub>4</sub>] =  $4 \times 10^{-2}$  M; T = 24 °C. The time interval is 60 seconds between two sequential lines.
